# Supplementary material
Source: Springer Nature journal article supplement (https://www.springermedizin.de/resource/supplementary/12979_2012_111_MOESM3_ESM.pdf/9603406)
Supplement: MOESM3 [file 9603406]

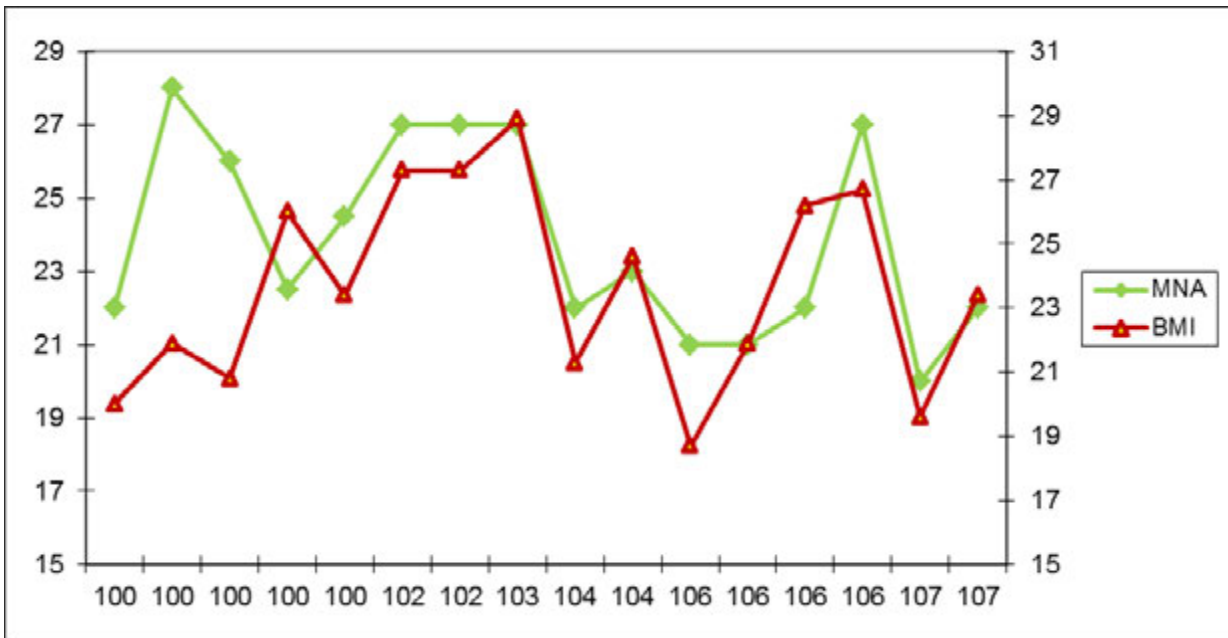

Legend:

MNA=mini nutritional assessment (17-24)

BMI= Body mass index (18-24)

On x axis, centenary age

On y axis: MNA and BMI
